1 ***Intestinal parasitic infection among household contacts of***  
2 ***primary cases, a comparative cross-sectional study.***

3 **Berhanu Elfu Feleke<sup>1\*</sup>, Melkamu Bedimo Beyene<sup>2</sup>, Teferi Elfu Feleke<sup>3</sup>, Tadesse Hailu**  
4 **Jember<sup>4</sup>, Bayeh Abera<sup>5</sup>**

5 <sup>1</sup>Department of Epidemiology and Biostatistics, University of Bahir Dar, Bahir Dar, Ethiopia

6 \*corresponding author

7 E-mail; [elfufeleke@gmail.com](mailto:elfufeleke@gmail.com) (BEF)

8 Telephone; +251918312095

9 ORCID; 0000-0001-9251-3337

10 <sup>2</sup>Department of Epidemiology and Biostatistics, University of Bahir Dar, Bahir Dar, Ethiopia

11 <sup>3</sup>Department of pediatrics, St Paul University, Addis Ababa, Ethiopia

12 <sup>4</sup>Department of Medical Laboratory Science, College of Medicine and Health Sciences, Bahir  
13 Dar University, Bahir Dar City, Ethiopia

14 <sup>5</sup>Department of Microbiology, College of Medicine and Health Sciences, Bahir Dar University,  
15 Ethiopia

16

17

18

19 **Abstract**

20 **Background:** Intestinal parasitic infection affects 3.5 billion people in the world and mostly  
21 affecting the low socio-economic groups. The objectives of this research were to estimate the  
22 prevalence and determinants of intestinal parasitic infection among family members of known  
23 intestinal parasite infected patients.

24 **Methods and materials:** A comparative cross-sectional study design was implemented in the  
25 urban and rural settings of mecha district. The data were collected from August 2017 to March  
26 2019 from intestinal parasitic infected patient household members. Epi-info software was used to  
27 calculate the sample size, 4531 household members were estimated to be included. Data were  
28 collected using interview technique and collecting stool samples from each household contact of  
29 intestinal parasite patients. Descriptive statistics were used to estimate the prevalence of  
30 intestinal parasites among known contacts of intestinal parasites patients/family members.  
31 Binary logistic regression was used to identify the determinant factors of intestinal parasitic  
32 infection among family members.

33 **Results:** The prevalence of intestinal parasite among household contacts of parasite-infected  
34 family members was 86.14 % [95% CI: 86.14 % - 87.15 %]. *Hookworm* parasitic infection was  
35 the predominant type of infection (18.8%). Intestinal parasitic infection was associated with sex,  
36 environmental sanitation, source of water, habit of playing with domestic animals, the presence  
37 of chicken in the house, the presence of household water filtering materials, overcrowding,  
38 personal hygiene, residence, and substandard house, role in the household, source of light for the  
39 house, floor materials, trimmed fingernails, family size, regular hand washing practice, barefoot.

40 **Conclusion:** The prevalence of intestinal parasites was high among household contacts of  
41 primary confirmed cases.

42 **Key words:** intestinal parasite, contact screening, secondary attack rate, household members.

## 43 **Introduction**

44 Intestinal parasites are groups of worm's primary affecting the gastrointestinal tracts broadly  
45 contains flatworms (tapeworms and flukes) and roundworms( ascariasis, pinworm, and  
46 hookworm infections)[1]. The mode of transmission includes ingestion of uncooked animal  
47 products, consuming infected water, absorption through the skin and fecal-oral [2].

48 Predominantly intestinal parasitic infection transmitted through feco-oral route [3]. That means  
49 all family members living in intestinal positive patients at higher risk of acquiring the infection.

50 A patient infected with intestinal parasite manifests with abdominal cramp, vomiting, excessive  
51 bowl sound, nausea, diarrhea, loss of appetite, malabsorption, skin itching [4]. Due to  
52 unspecified symptoms, the diagnosis of intestinal parasitic infection usually performed by taking  
53 stool samples and applying different laboratory techniques, concentration technique is more  
54 valid than the other laboratory techniques [5].

55 Intestinal parasitic infection affects 3.5 billion people in the world and mostly affecting the low  
56 socio-economic groups [6]. Soil-transmitted helminths infection (*Ascaris lumbricoid*, *Trichuris*  
57 *trichiura* and hookworm) alone affects 1.5 billion people worldwide [7]. Sub-Saharan Africa  
58 bears the highest burden for both helminths infection and other intestinal parasitic infections [8].

59 The complications of intestinal parasites include malnutrition, intestinal obstruction, growth  
60 retardation, immunodeficiency and affecting the socioeconomic development of the nations [9].

61 Intestinal parasitic infection was associated with gender, age and role in the household,  
62 socioeconomic characteristics, levels of education, poor sanitation, proximity to water sources,  
63 family size, environmental sanitation, hand washing practice, untrimmed fingernail, housing  
64 conditions, resident, barefoot [10-18]

65 The management of intestinal parasitic infection was not complicated and most intestinal  
66 parasitic infection can be effectively treated with a single dose anti-helminths. However, the  
67 intestinal parasitic intervention neglects the household contacts because there is no available  
68 evidence on the prevalence of intestinal parasites among household members; so, this study was  
69 conducted to give baseline evidence on the estimate of household secondary cases.

70 The objective of this research work was to estimate the prevalence and determinants of intestinal  
71 parasitic infection among family members of known intestinal parasitic infected patients.

## 72 **Methods and materials**

73 The comparative cross-sectional study design was implemented in the urban and rural settings of  
74 mecha district. Mecha district was located in the north-west of Ethiopia and the district contains  
75 10 health centers and 1 general hospital. The data were collected from August 2017 to March  
76 2019. Data were collected from intestinal parasitic infected patient household members.

77 The sample size was calculated using Epi-info software version 7 using the assumption of 95 %  
78 CI, power of 85, rural to an urban ratio of 2, none response rate of 10% gives 1510 household  
79 members from the urban setting and 3021 household members from the rural settings.

80 Household members were selected using contact tracing. Patient diagnosed positive for parasitic  
81 infection in the district health facility were used to trace for their family members intestinal  
82 parasitic infection status. All family members were screened for intestinal parasitic infection.

83 Data were collected using interview technique and collecting stool samples from each household  
84 contact of intestinal parasite patients. Clinical nurses were recruited for the data collection phase  
85 during interview and health officers were recruited for supervision. The stool samples were  
86 collected from each family member of known intestinal parasitic infected patients and  
87 transported to the nearby health facility for the analysis. From each known contact, one gram  
88 stool sample was collected in 10 ml SAF (sodium acetate- acetic acid-formalin solution). Formal  
89 ether concentration technique was used to identify the presence of intestinal parasites. The stool  
90 sample was well mixed and filtered using a funnel with gauze. Around 7 ML (Milliliter) normal  
91 saline and 3 ml of ether were added, mixed well and then centrifuged for 5 minutes at 2000  
92 RPM. Finally, the supernatant was discarded and the sediment was examined for parasites under  
93 the microscope [19].

94 Data were entered to Epi-info software and transported to SPSS for analysis. Descriptive  
95 statistics were used to estimate the prevalence of intestinal parasites among known contacts of  
96 intestinal parasites patients/family members. Binary logistic regression was used to identify the  
97 determinant factors of intestinal parasitic infection among family members. Hand washing  
98 practice was measured if the participants wash his/her hands after visiting the toilet, before  
99 cooking food and before feeding.

100 Ethical clearance was obtained from research and ethical review board from (institutional  
101 research review board) collage of medicine and health sciences, Bahir Dar University.

102 Permission letter was obtained from Amhara National Regional State Health Bureau ethical  
103 committee and Mecha district health office. Written informed consent was obtained from each  
104 study participants or guardians. Those study participants with intestinal parasites were referred to

105 the nearby health facility for further management. The confidentiality of the data was kept at all  
106 stages.

107

## 108 **Results**

109 A total of 4436 study participants were included giving for the response rate of 98 %. Female  
110 constitute 50% of the study participants, and 67% of the study participants were from the rural  
111 area. (Table 1)

112 **Table 1: Population profile of the study participants (n=4436)**

113

| SN <sup>1</sup> | Population profile                   | Frequency   | Percentage |      |
|-----------------|--------------------------------------|-------------|------------|------|
| 1.              | Sex                                  | Female      | 2206       | 49.7 |
|                 |                                      | Male        | 2230       | 50.3 |
| 2.              | Environmental sanitation             | Clean       | 1323       | 29.8 |
|                 |                                      | Dirty       | 3113       | 70.2 |
| 3.              | Source of light for the house        | Modern      | 1073       | 24.2 |
|                 |                                      | Traditional | 3363       | 75.8 |
| 4.              | Floor materials of the house         | Mud         | 3190       | 71.8 |
|                 |                                      | Others      | 1246       | 28.2 |
| 5.              | Household water filtering mechanisms | Present     | 861        | 19.4 |
|                 |                                      | Absent      | 3575       | 80.6 |

<sup>1</sup> Serial number

---

|     |                                |                    |      |      |
|-----|--------------------------------|--------------------|------|------|
| 6.  | Fingernails of the respondents | Trimmed            | 927  | 20.9 |
|     |                                | Not trimmed        | 3509 | 79.1 |
| 7.  | Family size                    | $\leq 4$           | 661  | 14.9 |
|     |                                | $>4$               | 3775 | 85.1 |
| 8.  | Educational status             | Illiterate         | 1744 | 39.3 |
|     |                                | Formal education   | 2557 | 57.6 |
|     |                                | Informal education | 135  | 3    |
| 9.  | Resident                       | Rural              | 2960 | 66.7 |
|     |                                | Urban              | 1476 | 33.3 |
| 10. | Marital status                 | Single             | 3320 | 74.8 |
|     |                                | Married            | 1056 | 23.8 |
|     |                                | Divorced           | 42   | 0.9  |
|     |                                | Widowed            | 18   | 0.4  |
| 11. | Age in years                   | 0-10               | 1744 | 39.3 |
|     |                                | 11-20              | 2035 | 45.9 |
|     |                                | 21-30              | 215  | 4.8  |
|     |                                | 31-40              | 303  | 6.8  |
|     |                                | 41-50              | 12   | 0.3  |
|     |                                | $>50$              | 127  | 2.9  |

---

114

115 The prevalence of intestinal parasitic infection among family members was 86.14 % [95% CI:

116 86.14 % - 87.15 %]. Hookworm parasitic infection (18.8%) was the predominant parasitic

117 infection followed by *Enatmeba histolytic* (11.4%), 36.2 % of family member has a heavy  
118 intensity of infection (Table 2).

119 **Table 2: The type of parasitic infection among household members**  
120 **(n=4436).**

121

| Intestinal parasitic species | Frequency | Percent |
|------------------------------|-----------|---------|
| Not infected                 | 615       | 13.9    |
| <i>Hookworm</i>              | 834       | 18.8    |
| <i>Ascaris lumbricoid</i>    | 375       | 8.5     |
| <i>S. mansoni</i>            | 198       | 4.5     |
| <i>Trichuris Trichiura</i>   | 332       | 7.5     |
| <i>E. histolytica</i>        | 505       | 11.4    |
| <i>Balantidium Coli</i>      | 411       | 9.3     |
| <i>G. lamblia</i>            | 302       | 6.8     |
| <i>Hymenolepis nana</i>      | 29        | .7      |
| Mixed infections             | 835       | 18.8    |

122  
123 **Intestinal Parasitic infection among children**

124 The prevalence of intestinal parasitic infection among children family members was 82.77 %  
125 [95% CI: 81.08 % -84.47 %]. After adjusting for sex, environmental sanitation, source of light  
126 for the house, floor material, the presence of water filtering materials, size of the fingernails,  
127 barefoot, family size, source of water, overcrowding, personal hygiene ,the presence of chicken



128 in the house, and substandard house: Intestinal parasitic infection among household members  
129 was associated with sex, environmental sanitation, source of water, habit of playing with  
130 domestic animals, the presence of chicken in the house, the presence of household water filtering  
131 materials, overcrowding, personal hygiene, residence, and substandard house (Table 3)

132

133

134

135

136

137 **Table 3: The determinants of intestinal parasitic infection among children household members**  
 138 **(n=1904).**

| Variable                                      | IP       |              | COR [ 95 % CI] | AOR [ 95 % CI]   | p-value          |       |
|-----------------------------------------------|----------|--------------|----------------|------------------|------------------|-------|
|                                               | Infected | Not infected |                |                  |                  |       |
| <b>Sex</b>                                    | Male     | 717          | 168            | 0.79 [0.62-1.02] | 0.76[0.58-0.99]  | 0.04  |
|                                               | Female   | 859          | 160            |                  |                  |       |
| <b>Environmental sanitation</b>               | Clean    | 168          | 10             | 3.79 [1.92-7.71] | 0.04 [0.01-0.14] | <0.01 |
|                                               | Dirty    | 1408         | 318            |                  |                  |       |
| <b>Household water filter</b>                 | Present  | 601          | 105            | 1.31 [1.01-1.70] | 0.28 [0.18-0.44] | <0.01 |
|                                               | Absent   | 975          | 223            |                  |                  |       |
| <b>Habit of playing with domestic animals</b> | Present  | 1166         | 261            | 0.73 [0.54-0.99] | 1.62 [1.08-2.45] | 0.02  |
|                                               | Absent   | 410          | 67             |                  |                  |       |
| <b>Chicken in the household</b>               | Present  | 1069         | 256            | 0.59 [0.44-0.79] | 4.42 [2.81-6.95] | <0.01 |
|                                               | Absent   | 507          | 72             |                  |                  |       |
| <b>Water source</b>                           | Pipe     | 443          | 234            | 0.16 [0.12-0.21] | 0.05 [0.03-0.07] | 0.03  |

---

|                          |           |      |     |                  |                  |       |
|--------------------------|-----------|------|-----|------------------|------------------|-------|
|                          | Others    | 1133 | 94  |                  |                  |       |
| <b>Overcrowding</b>      | Present   | 956  | 152 | 1.79 [1.40-2.28] | 2.14 [1.6-2.88]  | 0.01  |
|                          | Absent    | 620  | 176 |                  |                  |       |
|                          | Clean     | 1395 | 312 | 0.4 [0.22-0.68]  | 0.26 [0.07-0.93] | 0.04  |
| <b>Personal hygiene</b>  | Not clean | 181  | 16  |                  |                  |       |
| <b>Resident</b>          | Urban     | 576  | 92  | 1.48 [1.13-1.94] | 2.68 [1.86-3.89] | <0.01 |
|                          | Rural     | 1000 | 236 |                  |                  |       |
|                          | Yes       | 237  | 42  | 1.21 [0.84-1.74] | 1.92 [1.03-3.6]  | 0.04  |
| <b>Substandard house</b> | no        | 1339 | 286 |                  |                  |       |

---

## 140 **Intestinal parasitic infection in adult household members**

141 The prevalence of intestinal parasitic infection among household members whose age greater  
142 than 16 years was 88.67% [95% CI: 87.43 % -89.90%]. After adjusting for sex, role in the  
143 household, environmental sanitation, source of light for the house, floor materials of the house,  
144 habit of ingesting raw vegetables, the presence of household water filtering materials, trimmed  
145 fingernails, substandard house, habit of playing with domestic animals, family size, the presence  
146 of chicken in the house, handwashing behavior, source of water, overcrowding, barefoot,  
147 personal hygiene, residence and chronic illness: intestinal parasitic infection among household  
148 members was associated with sex, role in the household, environmental sanitation, source of  
149 light for the house, floor materials, the presence of household water filter, trimmed fingernails  
150 ,substandard house, habit of playing with domestic animals, family size, the presence of chicken  
151 in the house, regular hand washing practice, source of water for the house, barefoot, personal  
152 hygiene, resident (Table 4).

153

154

155

156

157 **Table 4: The determinants of intestinal parasitic infection among adults household members**  
 158 **(n=2532).**

| Variable                                      | IP       |          | COR [ 95 % CI] | AOR [ 95 % CI]     | p-value          |       |
|-----------------------------------------------|----------|----------|----------------|--------------------|------------------|-------|
|                                               | Positive | Negative |                |                    |                  |       |
| <b>Sex</b>                                    | Male     | 1079     | 266            | 0.07 [0.05-0.12]   | 0.04 [0.02-0.09] | <0.01 |
|                                               | Female   | 1166     | 21             |                    |                  |       |
| <b>Environmental sanitation</b>               | Clean    | 1280     | 107            | 2.23 [1.72-2.90]   | 0.18 [0.12-0.27] | 0.01  |
|                                               | Dirty    | 965      | 180            |                    |                  |       |
| <b>Water filter</b>                           | Present  | 74       | 81             | 0.09 [0.06 - 0.12] | 0.21[0.12-0.4]   | <0.01 |
|                                               | Absent   | 2171     | 206            |                    |                  |       |
| <b>Habit of playing with domestic animals</b> | Present  | 1670     | 149            | 2.69 [2.08 - 3.48] | 4.39 [2.58-7.47] | <0.01 |
|                                               | Absent   | 575      | 138            |                    |                  |       |
| <b>Chicken</b>                                | Present  | 1454     | 63             | 6.54 [4.83 – 8.85] | 3.59 [2.38-5.41] | <0.01 |
|                                               | Absent   | 791      | 224            |                    |                  |       |
| <b>Water source</b>                           | Pipe     | 1499     | 119            | 2.84 [2.19 – 3.67] | 0.16 [0.1-0.29]  | <0.01 |

---

|                               |                     |      |      |                    |                   |       |
|-------------------------------|---------------------|------|------|--------------------|-------------------|-------|
|                               | Others              | 746  | 168  |                    |                   |       |
| <b>Role in the household</b>  | Children or mothers | 1277 | 39   | 8.39 [5.85-12.07]  | 2.75 [1.51-4.99]  | 0.01  |
|                               | Others              | 968  | 248  |                    |                   |       |
|                               | Clean               | 2113 | 270  | 1.01 [0.58 - 1.74] | 0.04 [0.01-0.12]  | <0.01 |
| <b>Personal hygiene</b>       | Not clean           | 132  | 17   |                    |                   |       |
| <b>Resident</b>               | Urban               | 719  | 89   | 1.05 [0.8-1.38]    | 2.32 [1.5-3.55]   | <0.01 |
|                               | Rural               | 1526 | 198  |                    |                   |       |
|                               | Yes                 | 946  | 108  | 1.21 [0.93-1.57]   | 4.09[2.44-6.87]   | <0.01 |
| <b>Substandard house</b>      | no                  | 1299 | 179  |                    |                   |       |
| Source of light for the house | Traditional         | 1692 | 247  | 0.5 [0.34-0.71]    | 2.28 [1.19-4.37]  | <0.01 |
|                               | Modern              | 553  | 40   |                    |                   |       |
| Family size                   | >4                  | 1946 | 158  | 5.31 [4.05-6.97]   | 7.18 [3.89-13.37] | <0.01 |
|                               | ≤4                  | 299  | 129  |                    |                   |       |
| Regular hand washing practice | Present             | 208  | 2037 | 0.6 [0.41-0.87]    | 0.4 [0.2-0.79]    | <0.01 |

---

---

|          |        |      |     |                  |               |       |
|----------|--------|------|-----|------------------|---------------|-------|
|          | Absent | 42   | 245 |                  |               |       |
| Barefoot | Yes    | 1499 | 119 | 2.84 [2.19-3.67] | 4.5 [2.9-6.8] | <0.01 |
|          | No     | 746  | 168 |                  |               |       |

---

160

## 161 **Discussion**

162 The prevalence of intestinal parasitic infection among family members was 86.14 % [95% CI:  
163 86.14 % - 87.15 %]. The prevalence of intestinal parasitic infection among in children family  
164 members was 82.77 % [95% CI: 81.08 % -84.47 %]. The prevalence of intestinal parasitic  
165 infection among household members whose age greater than 16 years was 88.67% [95% CI:  
166 87.43 % -89.90%]. This finding was higher as compared to finding from England [20]. This  
167 might be due to the difference in the living condition. Our study area contains numerous  
168 contacts which increase the risk of acquiring intestinal parasites infection.

169 The odds of intestinal parasitic infections among female household members were 24% higher  
170 during childhood and 96% higher during adulthood. This finding agrees with other scholars  
171 works [21]. This is due to the fact that women in the household are responsible to care for the  
172 child and dispose of the waste of the child which increases their risk of acquiring the infection  
173 easily [22].

174 Environmental sanitation decreases the odds of intestinal parasitic infection by 96% during  
175 childhood and by 82% during adulthood. This finding agrees with finding from other parts of  
176 Ethiopia [23]. This is because environmental sanitation illuminates the reservoir for intestinal  
177 parasitic infection which finally blocks the infectious cycle of the parasites [24].

178 Household water filtering materials decrease the odds of intestinal parasitic infection by 72% in  
179 children and 79% in adults. This finding agrees with finding from systematic review pools across



180 the globe [25]. This is because water treatment at the households levels eliminates the eggs/cysts  
181 of intestinal parasites from the water[26].

182 A habit of playing with domestic animals increases the odds of intestinal parasitic infection by  
183 4.39 folds higher in children and 1.62 folds in adults. This finding agrees with finding from  
184 Canada [27]. This is because most intestinal parasitic infections are zoonotic in nature [28].

185 The presence of chicken in the household increases the odds of intestinal parasitic infection by  
186 4.42 folds higher in children and by 3.39 folds higher in adults. This finding agrees with findings  
187 from China[29]. This is because chickens act as a reservoir to numerous species of intestinal  
188 parasites [30].

189 Using pipe water decreases the odds of intestinal parasitic infection by 95% in children and by  
190 84 % in adults. This finding agrees with finding from Brazil [31]. This indicated that untreated  
191 water is a potential source of intestinal parasites infection [32].

192 The odds of intestinal parasitic infection were 2.75 higher in children and mothers as compared  
193 to other household members. This finding agrees with findings from Accra[33]. This is because  
194 of the proximity of mothers and children to the household wastes which harbors numerous  
195 intestinal parasites [34].

196 The odds of intestinal parasitic infection were 2.68 folds higher among urban children and 2.32  
197 folds higher in the urban adults. This finding agrees with findings from India [35]. This might be  
198 due to poor environmental sanitation with the overcrowding situation in urban area [36].

199 Personal hygiene decreases the odds of intestinal parasitic infection by 74 % lower in children  
200 and 96 % lower in adults. This finding agrees with systematic review report from the globe [37].  
201 This is because personal hygiene breaks the chain of intestinal parasitic infection [38].

202 Substandard housing increases the odds of intestinal parasitic infection by 1.92 folds higher in  
203 children and by 4 folds higher in adults. This finding agrees with finding from Brazil [39]. This  
204 is because people living under a better housing condition which has better sanitation facility [40].

205 The odds of intestinal parasitic infection were 2.28folds higher among household members using  
206 traditional light for their house. This finding agrees with clinical trial results [41]. This is because  
207 if the household was supplied with electricity, the household members can become aware of a  
208 health- related condition thought radio, television mass education which finally increases their  
209 awareness of a health related condition.

210 Regular hand washing practice decreases the odds of intestinal parasitic infection by 60 % lower.  
211 This finding was in line with 2018 finding from Ethiopia [42]. This is because regular hand  
212 washing practice breaks the life cycles of intestinal parasitic infection from an infected host to  
213 susceptible host[43].

214 Higher family size increases the odds of intestinal parasitic infection by 7.18 folds higher. This  
215 finding agrees with the previous finding from the same study area[44]. This is because high  
216 family size decreases the access to the basic sanitary facility due to sharing of the limited  
217 resources.

218 Barefoot increases the odds of intestinal parasitic infection by 4.5 folds higher. This finding was  
219 in line with 2018 results from Nigeria [45]. This is because barefoot allows the entry of intestinal  
220 parasites like hookworm at its infective stage [46].

221 The main limitation of this study was a failure to identify the incident and prevalent cases, but  
222 the overall aim of this study was to estimate the prevalence of intestinal parasitic infection  
223 among household members mixing of new or pre-existing cases will not create a huge problem.

## 224 **Conclusion**

225 The burden of intestinal parasites was high among household contacts of intestinal parasite  
226 infected family members. Intestinal parasitic infection among household members was  
227 determined by gender, environmental sanitation, household water treatment, habit of playing  
228 with domestic animals, The presence of chicken in the household, source of water, role in the  
229 household, resident, housing condition, source of light for the house, hand washing practice,  
230 family size, and barefoot.

## 231 **Recommendation**

232 Clinicians must trace and care for all household contacts of intestinal parasite patients in order to  
233 make the interventions effective.

## 234 **Acknowledgments**

235 Our heartfelt acknowledgment goes to household members for good cooperation during the field  
236 work. We would also like to acknowledge Mecha district health office for their unreserved  
237 efforts. At last but not least we would also like to acknowledge all organization and individuals  
238 that contributed to this research work.

## 239 **References**

- 240 1. Kaushik J, Baishya K, Sharma S, Sharma R. A REVIEW ON KRIMI ROGA IN  
241 CHILDREN WSR TO WORM INFESTATIONS. International Journal of Engineering Science  
242 and Generic Research. 2018;4(4).
- 243 2. Bhunia AK. Foodborne microbial pathogens: mechanisms and pathogenesis: Springer;  
244 2018.
- 245 3. Bharti B, Bharti S, Khurana S. Worm infestation: Diagnosis, treatment and prevention.  
246 The Indian Journal of Pediatrics. 2018;85(11):1017-24.
- 247 4. Botero JH, Castaño A, Montoya MN, Ocampo NE, Hurtado MI, Lopera MM. A  
248 preliminary study of the prevalence of intestinal parasites in immunocompromised patients with  
249 and without gastrointestinal manifestations. Revista do Instituto de Medicina Tropical de São  
250 Paulo. 2003;45(4):197-200.
- 251 5. Truant AL, Elliott SH, Kelly MT, Smith JH. Comparison of formalin-ethyl ether  
252 sedimentation, formalin-ethyl acetate sedimentation, and zinc sulfate flotation techniques for  
253 detection of intestinal parasites. Journal of clinical microbiology. 1981;13(5):882-4.
- 254 6. Saki J, Khademvatan S, Foroutan-Rad M, Gharibzadeh M. Prevalence of Intestinal  
255 Parasitic Infections in Haftkel County, Southwest of Iran. Int J Infect. 2017;4(4):e15593. Epub  
256 2016-06-01. doi: 10.5812/iji.15593.
- 257 7. Farrell SH, Coffeng LE, Truscott JE, Werkman M, Toor J, de Vlas SJ, et al. Investigating  
258 the effectiveness of current and modified world health organization guidelines for the control of  
259 soil-transmitted helminth infections. Clinical Infectious Diseases. 2018;66(suppl\_4):S253-S9.
- 260 8. Dejon-Agobé JC, Zinsou JF, Honkpehedji YJ, Ateba-Ngoa U, Edoa J-R, Adegbite BR, et  
261 al. Schistosoma haematobium effects on Plasmodium falciparum infection modified by soil-

- 262 transmitted helminths in school-age children living in rural areas of Gabon. PLoS neglected  
263 tropical diseases. 2018;12(8):e0006663.
- 264 9. Chifunda K, Kelly P. Parasitic infections of the gut in children. Paediatrics and  
265 international child health. 2018:1-8.
- 266 10. Kimani VN, Mitoko G, McDermott B, Grace D, Ambia J, Kiragu MW, et al. Social and  
267 gender determinants of risk of cryptosporidiosis, an emerging zoonosis, in Dagoretti, Nairobi,  
268 Kenya. Tropical animal health and production. 2012;44 Suppl 1:S17-23. Epub 2012/08/07. doi:  
269 10.1007/s11250-012-0203-4. PubMed PMID: 22865349.
- 270 11. Fernandez-Nino JA, Astudillo-Garcia CI, Segura LM, Gomez N, Salazar AS, Tabares JH,  
271 et al. [Profiles of intestinal polyparasitism in a community of the Colombian Amazon region].  
272 Biomedica : revista del Instituto Nacional de Salud. 2017;37(3):368-77. Epub 2017/10/03. doi:  
273 10.7705/biomedica.v37i3.3395. PubMed PMID: 28968014.
- 274 12. Faria CP, Zanini GM, Dias GS, da Silva S, de Freitas MB, Almendra R, et al. Geospatial  
275 distribution of intestinal parasitic infections in Rio de Janeiro (Brazil) and its association with  
276 social determinants. PLoS Negl Trop Dis. 2017;11(3):e0005445. Epub 2017/03/09. doi:  
277 10.1371/journal.pntd.0005445. PubMed PMID: 28273080; PubMed Central PMCID:  
278 PMC5358884.
- 279 13. Ross AG, Olveda RM, McManus DP, Harn DA, Chy D, Li Y, et al. Risk factors for  
280 human helminthiases in rural Philippines. International journal of infectious diseases : IJID :  
281 official publication of the International Society for Infectious Diseases. 2017;54:150-5. Epub  
282 2016/10/27. doi: 10.1016/j.ijid.2016.09.025. PubMed PMID: 27717859.

- 283 14. W AL-K, H AL-T, Al-khateeb A, Shanshal MM. Intestinal parasitic diarrhea among  
284 children in Baghdad--Iraq. *Trop Biomed*. 2014;31(3):499-506. Epub 2014/11/11. PubMed  
285 PMID: 25382477.
- 286 15. Tefera T, Mebrie G. Prevalence and predictors of intestinal parasites among food  
287 handlers in Yebu Town, southwest Ethiopia. *PLoS One*. 2014;9(10):e110621. Epub 2014/10/21.  
288 doi: 10.1371/journal.pone.0110621. PubMed PMID: 25329050; PubMed Central PMCID:  
289 PMCPMC4201565.
- 290 16. Schule SA, Clowes P, Kroidl I, Kowuor DO, Nsojo A, Mangu C, et al. *Ascaris*  
291 *lumbricoides* infection and its relation to environmental factors in the Mbeya region of Tanzania,  
292 a cross-sectional, population-based study. *PLoS One*. 2014;9(3):e92032. Epub 2014/03/20. doi:  
293 10.1371/journal.pone.0092032. PubMed PMID: 24643023; PubMed Central PMCID:  
294 PMCPMC3958400.
- 295 17. Abera B, Alem G, Yimer M, Herrador Z. Epidemiology of soil-transmitted helminths,  
296 *Schistosoma mansoni*, and haematocrit values among schoolchildren in Ethiopia. *J Infect Dev*  
297 *Ctries*. 2013;7(3):253-60. Epub 2013/03/16. doi: 10.3855/jidc.2539. PubMed PMID: 23493004.
- 298 18. Wumba R, Longo-Mbenza B, Menotti J, Mandina M, Kintoki F, Situakibanza NH, et al.  
299 Epidemiology, clinical, immune, and molecular profiles of microsporidiosis and  
300 cryptosporidiosis among HIV/AIDS patients. *International journal of general medicine*.  
301 2012;5:603-11. Epub 2012/08/28. doi: 10.2147/ijgm.s32344. PubMed PMID: 22924007;  
302 PubMed Central PMCID: PMCPMC3422901.
- 303 19. Institute S. *Methods in Parasitology*. Sodium acetate-acetic acid-formalin solution  
304 method for stool specimen. Basel: Swiss TPH: Swiss Tropical Institute; 2005. p. 1-18.

- 305 20. Waldram A, Vivancos R, Hartley C, Lamden K. Prevalence of Giardia infection in  
306 households of Giardia cases and risk factors for household transmission. *BMC Infect Dis.*  
307 2017;17(1):486. Epub 2017/07/12. doi: 10.1186/s12879-017-2586-3. PubMed PMID: 28693557;  
308 PubMed Central PMCID: PMCPmc5504742.
- 309 21. Eflu Feleke B. Epidemiology of Hookworm Infection in the School-age Children: A  
310 Comparative Cross-sectional Study. *Iranian journal of parasitology.* 2018;13(4):560-6. Epub  
311 2019/01/31. PubMed PMID: 30697309; PubMed Central PMCID: PMCPmc6348213.
- 312 22. Oyemade A, Omokhodion FO, Olawuyi JF, Sridhar MK, Olaseha IO. Environmental and  
313 personal hygiene practices: risk factors for diarrhoea among children of Nigerian market women.  
314 *Journal of Diarrhoeal Diseases Research.* 1998:241-7.
- 315 23. Gizaw Z, Adane T, Azanaw J, Addisu A, Haile D. Childhood intestinal parasitic infection  
316 and sanitation predictors in rural Dembiya, northwest Ethiopia. *Environmental health and*  
317 *preventive medicine.* 2018;23(1):26. Epub 2018/06/24. doi: 10.1186/s12199-018-0714-3.  
318 PubMed PMID: 29933747; PubMed Central PMCID: PMCPmc6015452.
- 319 24. McKenna ML, McAtee S, Bryan PE, Jeun R, Ward T, Kraus J, et al. Human Intestinal  
320 Parasite Burden and Poor Sanitation in Rural Alabama. *Am J Trop Med Hyg.* 2017;97(5):1623-  
321 8. Epub 2017/10/11. doi: 10.4269/ajtmh.17-0396. PubMed PMID: 29016326; PubMed Central  
322 PMCID: PMCPmc5817782.
- 323 25. Strunz EC, Addiss DG, Stocks ME, Ogden S, Utzinger J, Freeman MC. Water,  
324 sanitation, hygiene, and soil-transmitted helminth infection: a systematic review and meta-  
325 analysis. *PLoS medicine.* 2014;11(3):e1001620.
- 326 26. Amoah ID, Reddy P, Seidu R, Stenström TA. Removal of helminth eggs by centralized  
327 and decentralized wastewater treatment plants in South Africa and Lesotho: health implications

- 328 for direct and indirect exposure to the effluents. *Environmental Science and Pollution Research*.  
329 2018:1-13.
- 330 27. Luong L, Chambers J, Moizis A, Stock T, Clair CS. Helminth parasites and zoonotic risk  
331 associated with urban coyotes (*Canis latrans*) in Alberta, Canada. *Journal of helminthology*.  
332 2018:1-5.
- 333 28. Sarvi S, Daryani A, Sharif M, Rahimi MT, Kohansal MH, Mirshafiee S, et al. Zoonotic  
334 intestinal parasites of carnivores: A systematic review in Iran. *Veterinary world*. 2018;11(1):58.
- 335 29. Zheng H, He J, Wang L, Zhang R, Ding Z, Hu W. Risk Factors and Spatial Clusters of  
336 *Cryptosporidium* Infection among School-Age Children in a Rural Region of Eastern China.  
337 *International journal of environmental research and public health*. 2018;15(5):924.
- 338 30. Ybañez RHD, Resuelo KJG, Kintanar APM, Ybañez AP. Detection of gastrointestinal  
339 parasites in small-scale poultry layer farms in Leyte, Philippines. *Veterinary world*.  
340 2018;11(11):1587.
- 341 31. Ignacio CF, Silva M, Handam NB, Alencar MFL, Sotero-Martins A, Barata MML, et al.  
342 Socioenvironmental conditions and intestinal parasitic infections in Brazilian urban slums: a  
343 cross-sectional study. *Rev Inst Med Trop Sao Paulo*. 2017;59:e56. Epub 2017/08/10. doi:  
344 10.1590/s1678-9946201759056. PubMed PMID: 28793024; PubMed Central PMCID:  
345 PMCPmc5553943.
- 346 32. Abd Ellatif N, Mohamed M, El-Taweel H, Hamam M, Saudi M. Intestinal protozoa in  
347 diarrheic children in an Egyptian rural area: Role of water contamination and other possible risk  
348 factors. *Parasitologists United Journal*. 2018;11(2):82-9.



- 349 33. Forson AO, Arthur I, Ayeh-Kumi PF. The role of family size, employment and education  
350 of parents in the prevalence of intestinal parasitic infections in school children in Accra. *PloS*  
351 *one*. 2018;13(2):e0192303.
- 352 34. Zavala GA, García OP, Camacho M, Ronquillo D, Campos-Ponce M, Doak C, et al.  
353 Intestinal parasites: Associations with intestinal and systemic inflammation. *Parasite*  
354 *immunology*. 2018;40(4):e12518.
- 355 35. Sarkar R, Kattula D, Francis MR, Ajjampur SS, Prabakaran AD, Jayavelu N, et al. Risk  
356 factors for cryptosporidiosis among children in a semi urban slum in southern India: a nested  
357 case-control study. *Am J Trop Med Hyg*. 2014;91(6):1128-37. Epub 2014/10/22. doi:  
358 10.4269/ajtmh.14-0304. PubMed PMID: 25331810; PubMed Central PMCID:  
359 PMCPmc4257634.
- 360 36. Coker AO. Negative impacts of waste on human health and environment in Nigeria's  
361 urban areas: innovative solutions to the rescue. *Global Health Innovation*. 2018;1(2).
- 362 37. Cholapranee A, Ananthkrishnan AN. Environmental Hygiene and Risk of Inflammatory  
363 Bowel Diseases: A Systematic Review and Meta-analysis. *Inflammatory bowel diseases*.  
364 2016;22(9):2191-9. Epub 2016/08/03. doi: 10.1097/mib.0000000000000852. PubMed PMID:  
365 27482977; PubMed Central PMCID: PMCPmc4992453.
- 366 38. Leibler JH, Nguyen DD, Leon C, Gaeta JM, Perez D. Personal Hygiene Practices among  
367 Urban Homeless Persons in Boston, MA. *Int J Environ Res Public Health*. 2017;14(8). Epub  
368 2017/08/19. doi: 10.3390/ijerph14080928. PubMed PMID: 28820454; PubMed Central PMCID:  
369 PMCPmc5580630.
- 370 39. Da Silva JB, Bossolani GD, Piva C, Dias GB, Gomes Ferreira J, Rossoni DF, et al.  
371 Spatial distribution of intestinal parasitic infections in a Kaingang indigenous village from

- 372 Southern Brazil. *International journal of environmental health research*. 2016;26(5-6):578-88.  
373 Epub 2016/08/20. doi: 10.1080/09603123.2016.1217312. PubMed PMID: 27538355.
- 374 40. Crighton E, Gordon H, Barakat-Haddad C. Environmental health inequities: from global  
375 to local contexts. *Routledge Handbook of Health Geography*: Routledge; 2018. p. 59-66.
- 376 41. Steinbaum L, Mboya J, Mahoney R, Njenga SM, Null C, Pickering AJ. Effect of a  
377 sanitation intervention on soil-transmitted helminth prevalence and concentration in household  
378 soil: A cluster-randomized controlled trial and risk factor analysis. *PLOS Neglected Tropical*  
379 *Diseases*. 2019;13(2):e0007180.
- 380 42. Feleke BE, Jember TH. Prevalence of helminthic infections and determinant factors  
381 among pregnant women in Mecha district, Northwest Ethiopia: a cross sectional study. *BMC*  
382 *Infect Dis*. 2018;18(1):373. Epub 2018/08/08. doi: 10.1186/s12879-018-3291-6. PubMed PMID:  
383 30081837; PubMed Central PMCID: PMC6080381.
- 384 43. Means AR, van Lieshout L, Brienen E, Yuhas K, Hughes JP, Ndungu P, et al. Combined  
385 effectiveness of anthelmintic chemotherapy and WASH among HIV-infected adults. *PLoS*  
386 *neglected tropical diseases*. 2018;12(1):e0005955.
- 387 44. Feleke BE. Nutritional Status and Intestinal Parasite in School Age Children: A  
388 Comparative Cross-Sectional Study. *International journal of pediatrics*. 2016;2016:1962128.  
389 Epub 2016/09/23. doi: 10.1155/2016/1962128. PubMed PMID: 27656219; PubMed Central  
390 PMCID: PMC6080381.
- 391 45. Ugbomeh A, Goodhead D, Green A, Onwuteaka J. Prevalence of Human Intestinal  
392 Nematode Parasites in Three Rural Communities of the Niger Delta, Nigeria. 2018.
- 393 46. Mohanty A, Gupta P, Gupta P, Prasad RS. Diagnostic Dilemma in Hookworm Infection:  
394 An Unusual Presentation. *Int J Curr Microbiol App Sci*. 2018;7(3):3769-71.
